# Supplementary material
Source: Royal Society of Chemistry journal article supplement (doi:10.1039/d6cp00688d)
Supplement: d6cp00688d1.pdf [file d6cp00688d1.pdf]

# Electronic Supplementary Information

## **Synergistic Enhancement of Hydrogen Evolution on MoS<sub>2</sub> by Sulfur Vacancy and Transition Metal Doping: A DFT and Machine Learning Study**

*Xin Fan, Xiaocheng Zhou,\* and Yafei Li\**

Jiangsu Key Laboratory of New Power Batteries, Jiangsu Collaborative Innovation Centre of Biomedical  
Functional Materials, School of Chemistry and Materials Science, Nanjing Normal University, Nanjing  
210023, China

\*E-mail: [xczhou@njnu.edu.cn](mailto:xczhou@njnu.edu.cn) (XZ) and [liyafei@njnu.edu.cn](mailto:liyafei@njnu.edu.cn) (YL)

### **Contents:**

1. Computational Details
2. Supporting Fig. S1–S13
3. Supporting Table S1–S8

# 1. Computational Details

## 1.1 The charge-extrapolation method

The charge-extrapolation method for determining constant potential barriers from a constant charge calculation is based upon two assumptions: (1) The chemical and electrostatic contributions to reaction energetics are separable. (2) The electrostatic contributions to proton–electron transfer are described by a basic capacitor model.<sup>1</sup>

The total energy change between two states, e.g., 1 for the initial state (IS) and 2 for the transition state (TS), can be defined as:

$$E_2(\Phi_1) - E_1(\Phi_1) = E_2(\Phi_2) - E_1(\Phi_1) + \frac{(q_2 - q_1)(\Phi_2 - \Phi_1)}{2} \quad (\text{S1})$$

where  $q$  represents the interface charge and  $E(\Phi)$  is the DFT energy of the state at the electrode potential. The  $\Phi$  term is the work function, which is calculated from the local potential and is given by the following equation:

$$\Phi = E_{\text{vac}} - E_{\text{F}} \quad (\text{S2})$$

where  $E_{\text{vac}}$  and  $E_{\text{F}}$  represent the vacuum level and the Fermi level, respectively. The value of  $q_2 - q_1$  is derived from the Bader analysis. The term  $E_2(\Phi_2) - E_1(\Phi_1)$ , taking 1 for IS and 2 for TS as an example, represents the DFT energy difference between IS and TS.

## 1.2 SISSO algorithm

SISSO (Sure Independence Screening and Sparsifying Operator) is a data-driven approach that combines symbolic regression and compressed sensing techniques.<sup>2</sup> This methodology aims to extract key information from large datasets that effectively characterises target attributes, thereby establishing an accurate and interpretable explicit mathematical model.

The key to this method lies in constructing a vast initial feature space  $\{\phi_i\}$ . This space is generated by recursively applying a series of mathematical operators to the initial physicochemical features of the input. The introduction of these operators—including addition, subtraction, multiplication, division, exponentiation, and root extraction—aims to systematically explore nonlinear combinations among the original features, thereby providing a rich pool of candidate descriptors for the subsequent screening stages.

To identify the most effective descriptors from a vast feature space, the SISSO algorithm primarily executes through two core steps. First, the Sure Independence Screening (SIS) establishes the correlation between each candidate feature and the target property. Through rapid sorting and preliminary screening, the feature space dimension is compressed to a manageable scale commensurate with the dataset size. Subsequently, the Sparsifying Operator

(SO) refines the selected feature subset by solving an L0-regularised sparse regression problem. This process identifies the minimal number of key descriptors required, ensuring model sparsity and high predictive accuracy.

In this work, we employ key features obtained through feature engineering as inputs and the hydrogen adsorption free energy ( $\Delta G_{H^*}$ ) as the target variable to train the SISSO framework. Ultimately, the algorithm outputs a linear model composed of these selected descriptors. This model not only demonstrates outstanding predictive performance, but its mathematical formulation also directly reveals the key physicochemical factors influencing hydrogen adsorption free energy.

## 2. Supporting Fig. S1-S13

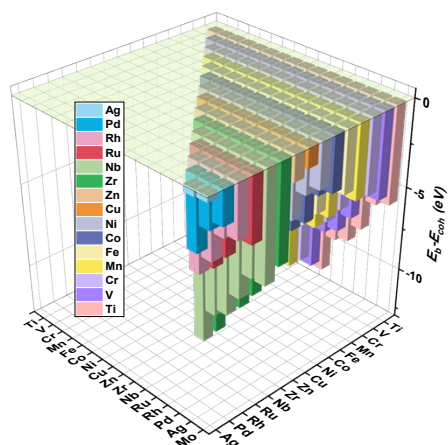

**Fig. S1.** The difference between binding and cohesive energy ( $E_b - E_{coh}$ ) for  $TM@S_V-MoS_2$ .

| Systems                              | S <sub>V</sub>                                                                     | Mo                                                                                 | TM                                                                                 | Systems                              | S <sub>V</sub>                                                                      | Mo                                                                                   | TM                                                                                   |
|--------------------------------------|------------------------------------------------------------------------------------|------------------------------------------------------------------------------------|------------------------------------------------------------------------------------|--------------------------------------|-------------------------------------------------------------------------------------|--------------------------------------------------------------------------------------|--------------------------------------------------------------------------------------|
| 1Cr@S <sub>V</sub> -MoS <sub>2</sub> | -0.49                                                                              | -0.49                                                                              | -0.49                                                                              | 2Cr@S <sub>V</sub> -MoS <sub>2</sub> | -0.38                                                                               | -0.38                                                                                | -0.38                                                                                |
|                                      | 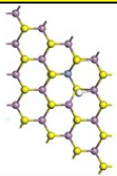  |   |   |                                      |   |   |   |
| 1Mn@S <sub>V</sub> -MoS <sub>2</sub> | -0.23                                                                              | -0.22                                                                              | -0.20                                                                              | 2Mn@S <sub>V</sub> -MoS <sub>2</sub> | -0.10                                                                               | -0.10                                                                                | -0.10                                                                                |
|                                      |   |   |   |                                      |   |   |   |
| 1Fe@S <sub>V</sub> -MoS <sub>2</sub> | -0.26                                                                              | -0.26                                                                              | -0.26                                                                              | 2Fe@S <sub>V</sub> -MoS <sub>2</sub> | 0.19                                                                                | 0.20                                                                                 | 0.19                                                                                 |
|                                      |   |   |   |                                      |   |   |   |
| 1Co@S <sub>V</sub> -MoS <sub>2</sub> | -0.20                                                                              | -0.24                                                                              | 0.65                                                                               | 2Co@S <sub>V</sub> -MoS <sub>2</sub> | 0.86                                                                                | 0.96                                                                                 | 1.04                                                                                 |
|                                      |  |  |  |                                      |  |  |  |

**Fig. S2.** Investigation of H adsorption sites on TM@S<sub>V</sub>-MoS<sub>2</sub> systems.

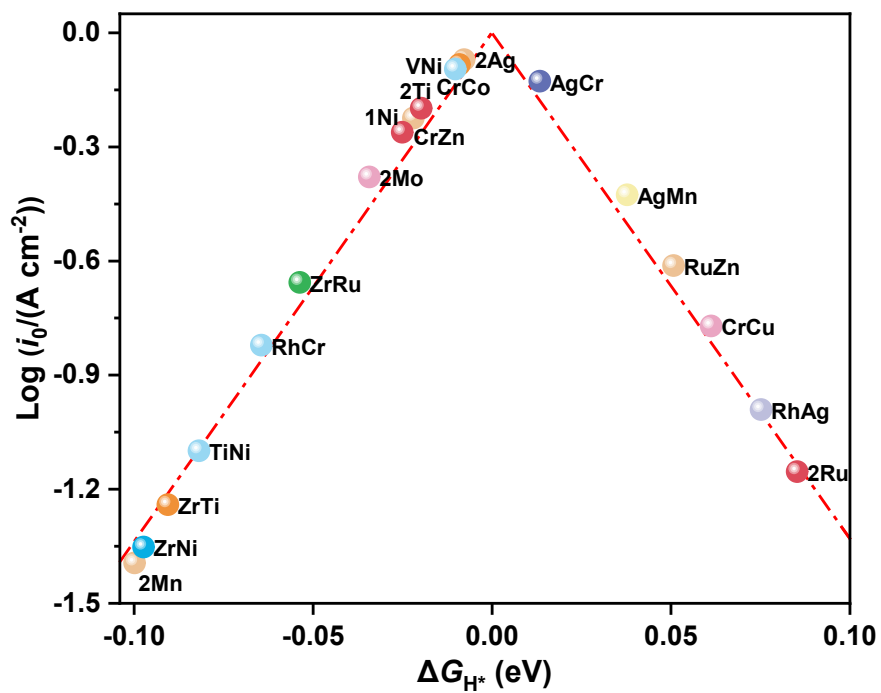

**Fig. S3.** Volcano plot correlating the exchange current density ( $i_0$ ) with  $\Delta G_{H^*}$ , where  $\Delta G_{H^*}$  ranges from -0.1 to 0.1 eV.



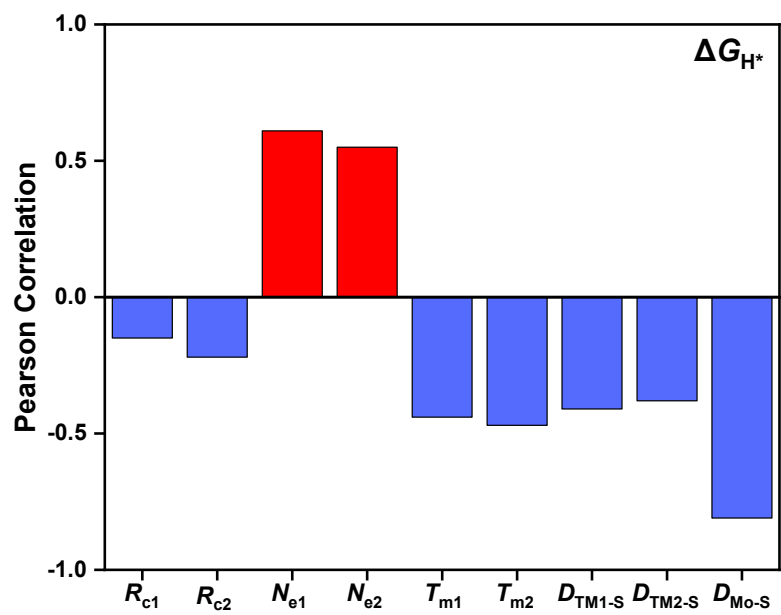

**Fig. S5.** Pearson correlation plot between the optimized features and the target value.

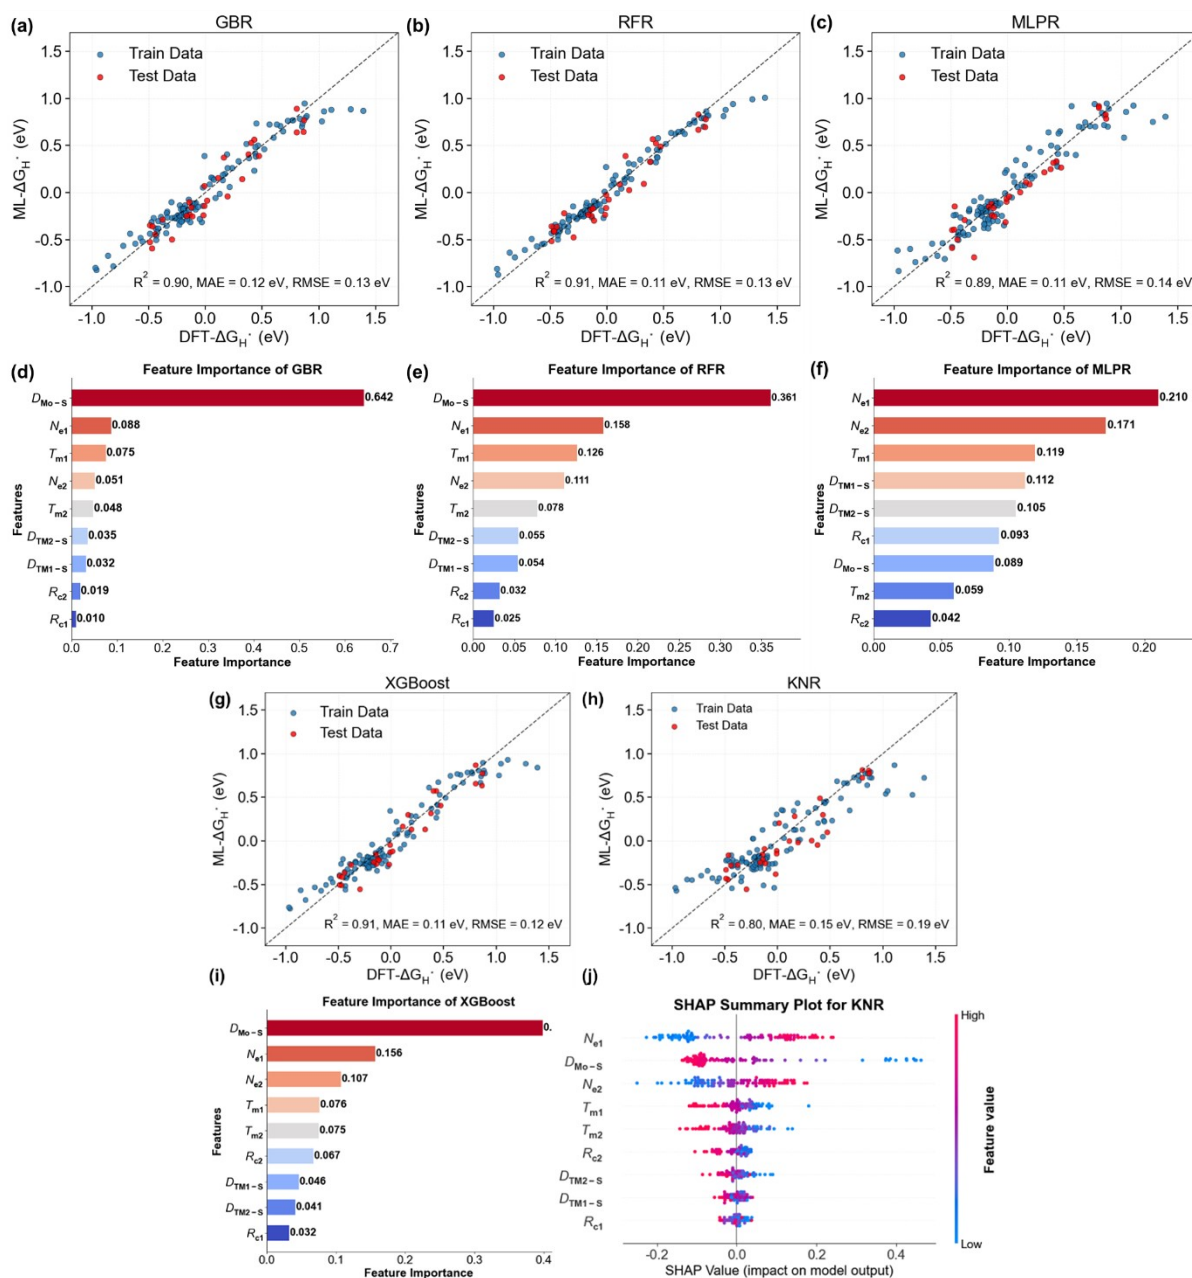

**Fig. S6.** Comparison of DFT-calculated and SVR-predicted  $\Delta G_{H^*}$  values for GBR, RFR, MLPR, XGBoost and KNR models, and the analysis of feature importance.

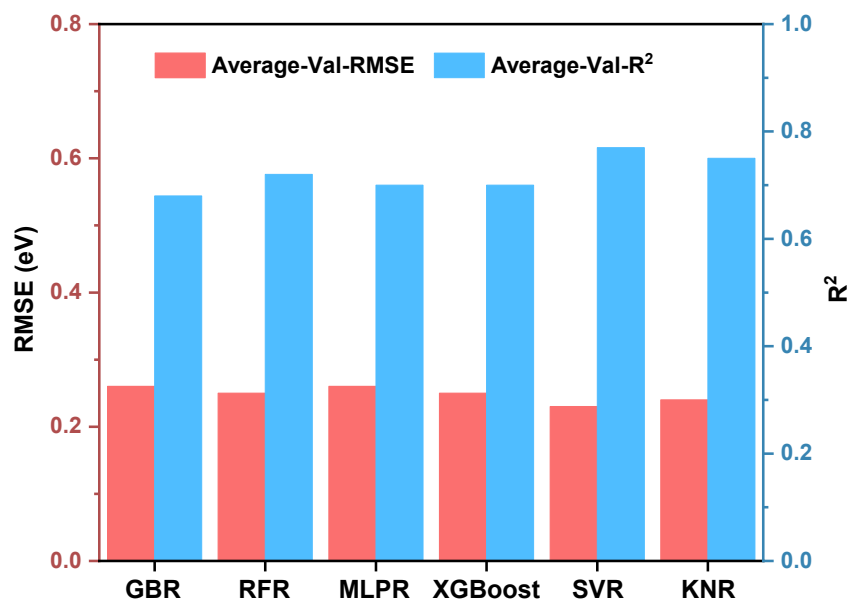

**Fig. S7.** The average RMSE and R<sup>2</sup> of GBR, RFR, MLPR, XGBoost and KNR models after 5-fold cross-validation.

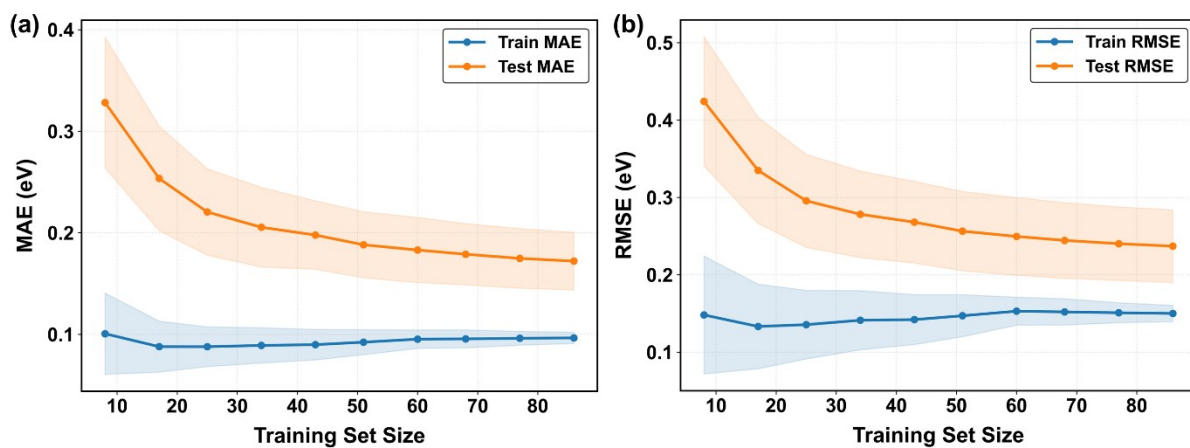

**Fig. S8.** Learning curve analysis of the SVR model. Evolution of (a) MAE and (b) RMSE with increasing training set size.

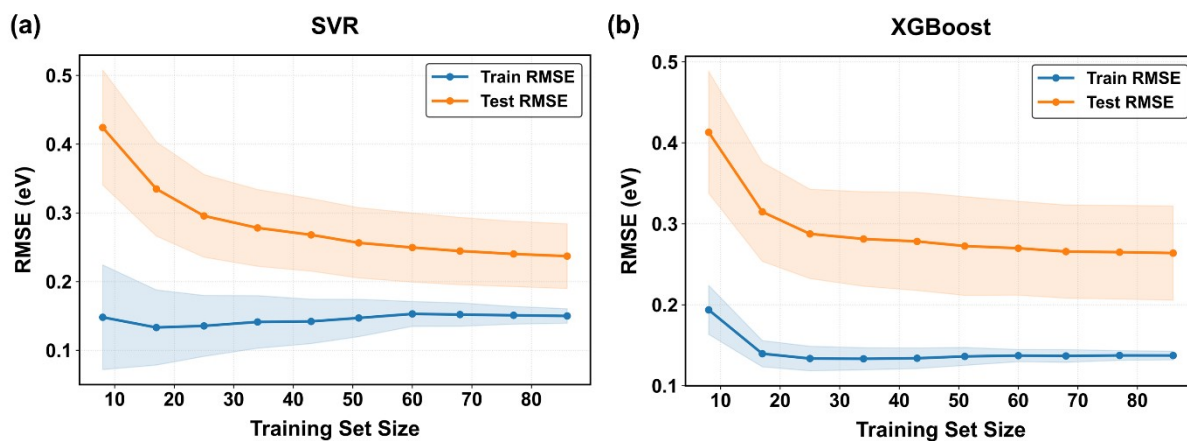

**Fig. S9.** Learning curve analysis of the (a) SVR model and (b) XGBoost model.

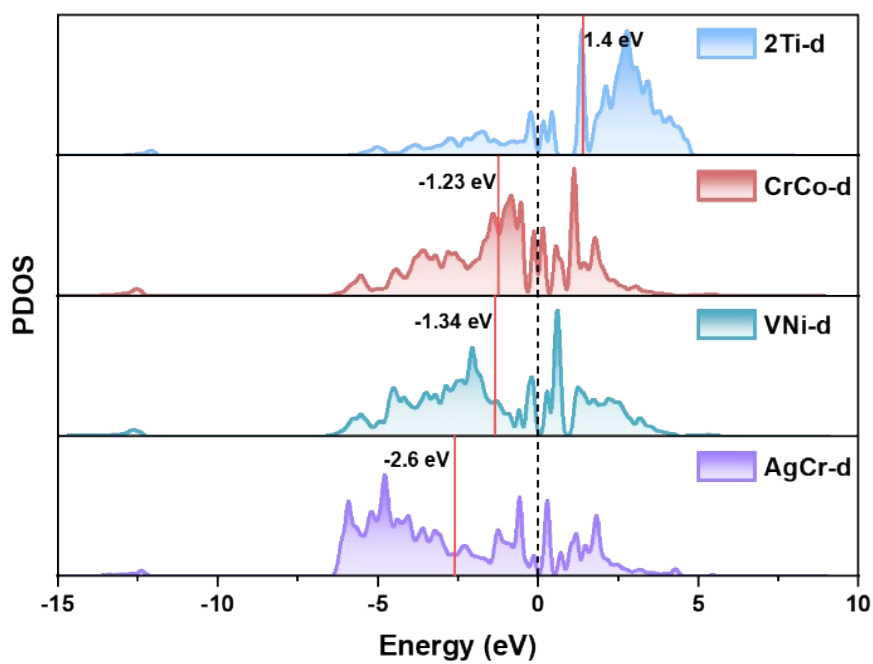

**Fig. S10.** PDOS of 2Ti@S<sub>V</sub>-MoS<sub>2</sub>, CrCo@S<sub>V</sub>-MoS<sub>2</sub>, VNi@S<sub>V</sub>-MoS<sub>2</sub>, and AgCr@S<sub>V</sub>-MoS<sub>2</sub>. The corresponding d-band center values are indicated.

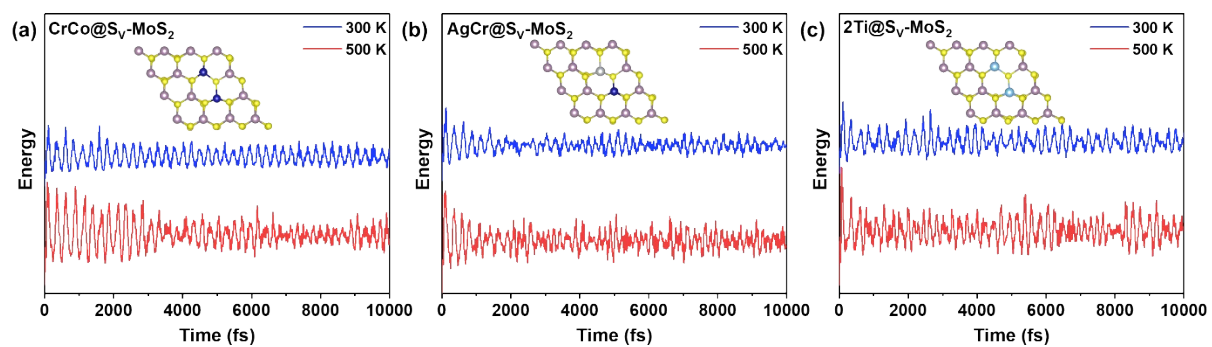

**Fig. S11.** AIMD of  $\text{CrCo@S}_V\text{-MoS}_2$ ,  $\text{AgCr@S}_V\text{-MoS}_2$  and  $2\text{Ti@S}_V\text{-MoS}_2$  at both 300 K and 500 K.

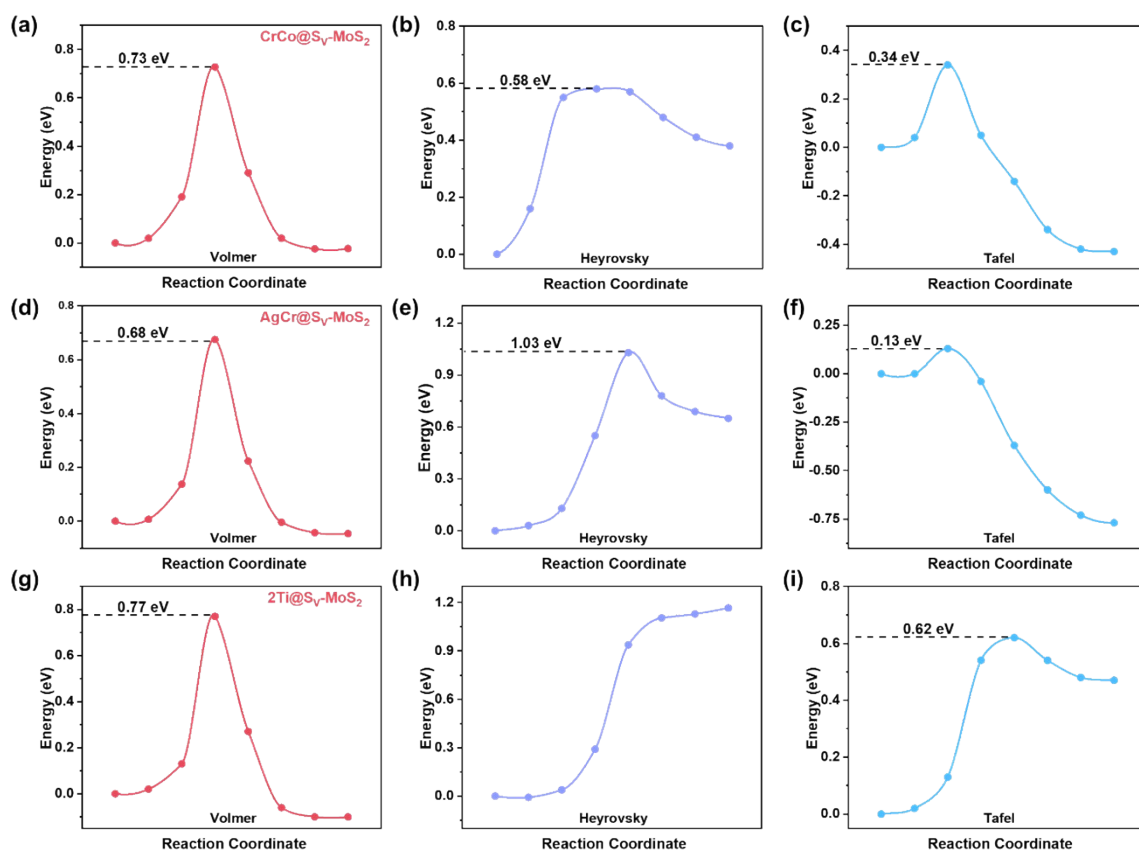

**Fig. S12.** CINEB of (a-c) CrCo@S<sub>v</sub>-MoS<sub>2</sub>, (d-f) AgCr@S<sub>v</sub>-MoS<sub>2</sub>, and (g-i) 2Ti@S<sub>v</sub>-MoS<sub>2</sub>.

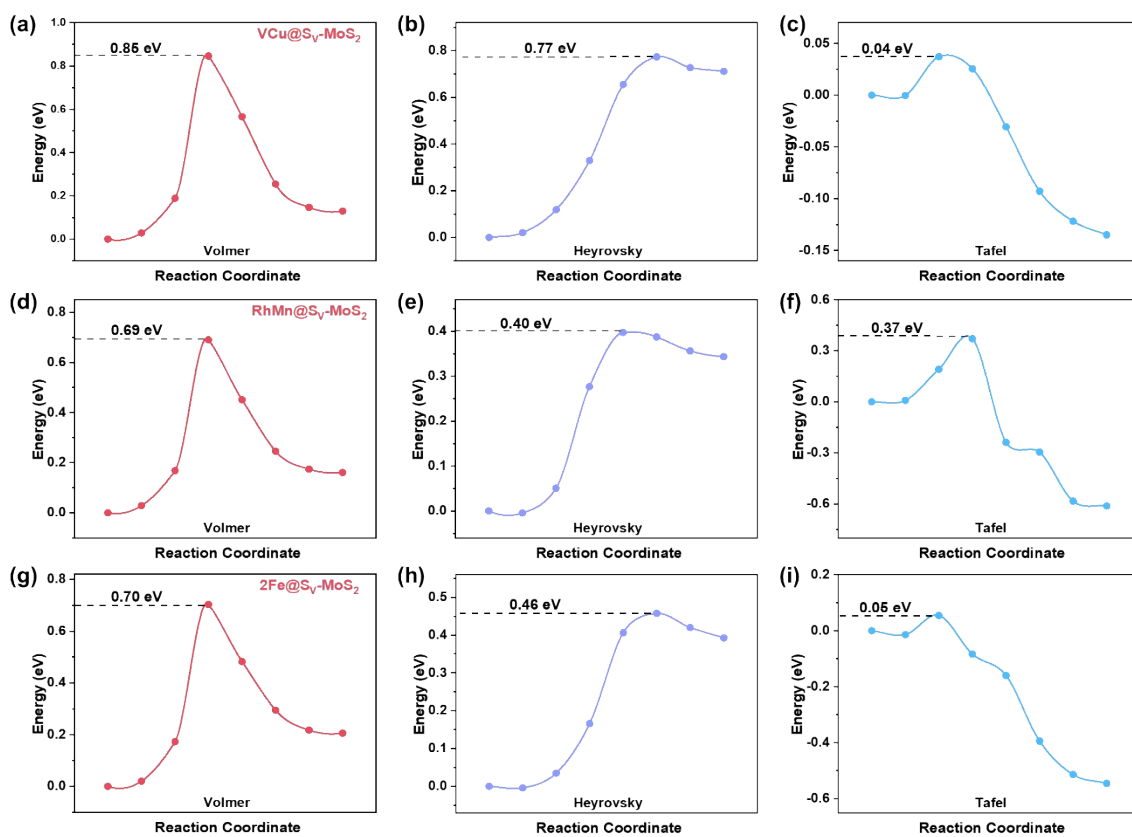

**Fig. S13.** CI-NEB of (a-c) VCu@S<sub>V</sub>-MoS<sub>2</sub>, (d-f) RhMn@S<sub>V</sub>-MoS<sub>2</sub>, and (g-i) 2Fe@S<sub>V</sub>-MoS<sub>2</sub>.

### 3. Supporting Table S1-S8

**Table S1.** Comparison of  $|\Delta G_{H^*}|$  for TM@S<sub>V</sub>-MoS<sub>2</sub> in 4×4×1 and 5×5×1 supercells. The supercell size has a limited impact on adsorption energy.

| Materials                             | $ \Delta G_{H^*} $ (4×4×1)/eV | $ \Delta G_{H^*} $ (5×5×1)/eV |
|---------------------------------------|-------------------------------|-------------------------------|
| 2Ti@S <sub>V</sub> -MoS <sub>2</sub>  | 0.0198                        | 0.0067                        |
| AgCr@S <sub>V</sub> -MoS <sub>2</sub> | 0.0134                        | 0.0316                        |
| CrCo@S <sub>V</sub> -MoS <sub>2</sub> | 0.0102                        | 0.0166                        |
| VNi@S <sub>V</sub> -MoS <sub>2</sub>  | 0.0091                        | 0.0094                        |

**Table S2.** The initial features used in training model and intrinsic descriptor of atoms.

| Features                      |                  |
|-------------------------------|------------------|
| Doped transition metal number | $N_{tm}$         |
| Pauling electronegativity     | $\chi$           |
| Metal atomic radius           | $R_a$            |
| Covalent radius               | $R_c$            |
| Van der Waals radius          | $R_{vdW}$        |
| The first ionization energy   | $IE$             |
| The second ionization energy  | $2-IE$           |
| Combined feature              | $R_{vdW}/IE$     |
| Electronic Affinity           | $EA$             |
| Valence electron number       | $N_e$            |
| d electron number             | $N_d$            |
| Period number                 | $N_p$            |
| Group number                  | $N_g$            |
| Boiling point                 | $T_b$            |
| Melting point                 | $T_m$            |
| Fusion heat                   | $\lambda$        |
| Vaporization heat             | $\Delta H_{vap}$ |
| Distance between $TM_1$ and S | $D_{TM1-S}$      |
| Distance between $TM_2$ and S | $D_{TM2-S}$      |
| Distance between Mo and S     | $D_{Mo-S}$       |

**Table S3.** The hyperparameters of all models used in this work.

| Algorithm | Hyperparameters                                                                                                                                             |
|-----------|-------------------------------------------------------------------------------------------------------------------------------------------------------------|
| GBR       | random_state=0, learning_rate=0.03, max_depth=3,<br>n_estimators=100, subsample=0.8, min_samples_leaf=5,<br>min_samples_split=20                            |
| RFR       | random_state=0, n_estimators=120,<br>max_depth=5, min_samples_leaf=1,<br>min_samples_split=4, max_features='sqrt'<br>random_state=0, activation='logistic', |
| MLPR      | hidden_layer_sizes=(4,), learning_rate_init=0.1,<br>max_iter=500, alpha=0.01                                                                                |
| XGBoost   | random_state=0, learning_rate=0.1, n_estimators=200,<br>max_depth=3, gamma=0.1, min_child_weight=3,<br>subsample=0.7, colsample_bytree=0.8                  |
| SVR       | kernel='rbf', C=0.5, epsilon=0.05, gamma=0.1                                                                                                                |
| KNR       | n_neighbors=8                                                                                                                                               |

**Table S4.** Descriptors identified in the SISSO model.

|       | $d_1$                                   | $d_2$                      | $d_3$                                   | $c_1$   | $c_2$     | $c_3$    | $c_0$    | $R^2$ |
|-------|-----------------------------------------|----------------------------|-----------------------------------------|---------|-----------|----------|----------|-------|
| 1D-1F | $N_{e1} \times N_{e2}$                  |                            |                                         | 0.01344 |           |          | -0.81394 | 0.69  |
| 1D-2F | $\frac{Ne1 \times Ne2}{Rc2}$            |                            |                                         | 0.01819 |           |          | -0.82931 | 0.74  |
| 1D-3F | $\frac{Ne1 \times Ne2}{Rc2 \times DMO}$ |                            |                                         | 0.04020 |           |          | -0.80016 | 0.76  |
| 2D-1F | $N_{e1} \times N_{e2}$                  | $ T_{m1}-T_{m2} $          |                                         | 0.01385 | -0.00026  |          | -0.68977 | 0.84  |
| 2D-2F | $\frac{Ne1 \times Ne2}{Rc2}$            | $\frac{ Tm1 - Tm2 }{Rc2}$  |                                         | 0.01856 | -0.00031  |          | -0.71179 | 0.86  |
| 2D-3F | $\frac{Ne1 \times Ne2}{\sqrt{Tm1}}$     | $T_{m1} +  T_{m1}-T_{m2} $ |                                         | 0.00033 | -0.00029  |          | -0.10455 | 0.85  |
| 3D-1F | $N_{e1} \times N_{e2}$                  | $DMo - S^6$                | $ T_{m1}-T_{m2} $                       | 0.01001 | -0.00710  | -0.00022 | 0.61880  | 0.87  |
| 3D-2F | $\frac{DMo - S^3}{Ne2}$                 | $\frac{\exp(-Ne2)}{Ne1}$   | $\frac{(N_{e1}-N_{e2})}{\times T_{m1}}$ | -1.2289 | 438.19984 | 0.00006  | 2.05812  | 0.92  |

**Table S5.** Changes in energy  $E$ , work function  $\Phi$ , charge  $q$ , the extrapolated reaction energy  $\Delta E$  and activation energy  $E_a$ . The energy difference between  $E_{\text{TS}}$  and  $E_{\text{IS}}$  ( $E_{\text{TS}}-E_{\text{IS}}$ ) represents the barriers obtained from the CI-NEB calculations.

| Materials                                 | Reaction  | $E_{\text{FS}}^-$<br>$E_{\text{IS}}$ | $\Phi_{\text{FS}}^-$<br>$\Phi_{\text{IS}}$ | $E_{\text{TS}}^-$<br>$E_{\text{IS}}$ | $\Phi_{\text{TS}}^-$<br>$\Phi_{\text{IS}}$ | $q_{\text{FS}}^-$<br>$q_{\text{IS}}$ | $q_{\text{TS}}^-$<br>$q_{\text{IS}}$ | $\Delta E$ | $E_a/\text{eV}$ |
|-------------------------------------------|-----------|--------------------------------------|--------------------------------------------|--------------------------------------|--------------------------------------------|--------------------------------------|--------------------------------------|------------|-----------------|
| 2Ti@<br>S <sub>V</sub> -MoS <sub>2</sub>  | Vlomer    | -0.10                                | 1.04                                       | -1.23                                | -0.74                                      | 0.77                                 | 0.66                                 | -0.57      | 0.58            |
|                                           | Heyrovsky | /                                    | /                                          | /                                    | /                                          | /                                    | /                                    | /          | /               |
| AgCr@<br>S <sub>V</sub> -MoS <sub>2</sub> | Vlomer    | -0.05                                | 0.79                                       | -1.09                                | -0.47                                      | 0.68                                 | 0.45                                 | -0.50      | 0.56            |
|                                           | Heyrovsky | 0.65                                 | 0.76                                       | -0.50                                | 0.46                                       | 1.03                                 | 0.28                                 | -0.18      | 1.01            |
| CrCo@<br>S <sub>V</sub> -MoS <sub>2</sub> | Vlomer    | -0.02                                | 0.60                                       | -1.10                                | -0.35                                      | 0.73                                 | 0.30                                 | -0.54      | 0.65            |
|                                           | Heyrovsky | 0.38                                 | 1.04                                       | -0.50                                | 0.12                                       | 0.58                                 | 1.29                                 | -0.51      | 0.25            |
| VNi@<br>S <sub>V</sub> -MoS <sub>2</sub>  | Vlomer    | -0.16                                | 0.76                                       | -1.14                                | -0.59                                      | 0.66                                 | 0.43                                 | -0.54      | 0.55            |
|                                           | Heyrovsky | 0.56                                 | 0.87                                       | -0.45                                | 0.37                                       | 0.68                                 | 0.70                                 | -0.39      | 0.54            |

**Table S6.** Changes in energy  $E$ , work function  $\Phi$ , charge  $q$ , the extrapolated reaction energy  $\Delta E$  and activation energy  $E_a$ . The energy difference between  $E_{\text{TS}}$  and  $E_{\text{IS}}$  ( $E_{\text{TS}}-E_{\text{IS}}$ ) represents the barriers obtained from the CI-NEB calculations.

| Materials                                 | Reaction  | $E_{\text{FS}}^-$<br>$E_{\text{IS}}$ | $\Phi_{\text{FS}}^-$<br>$\Phi_{\text{IS}}$ | $E_{\text{TS}}^-$<br>$E_{\text{IS}}$ | $\Phi_{\text{TS}}^-$<br>$\Phi_{\text{IS}}$ | $q_{\text{FS}}^-$<br>$q_{\text{IS}}$ | $q_{\text{TS}}^-$<br>$q_{\text{IS}}$ | $\Delta E$ | $E_a/\text{eV}$ |
|-------------------------------------------|-----------|--------------------------------------|--------------------------------------------|--------------------------------------|--------------------------------------------|--------------------------------------|--------------------------------------|------------|-----------------|
| VCu@<br>S <sub>V</sub> -MoS <sub>2</sub>  | Vlomer    | 0.13                                 | 0.79                                       | -1.14                                | -0.32                                      | 0.85                                 | 0.45                                 | -0.56      | 0.72            |
|                                           | Heyrovsky | 0.71                                 | 0.71                                       | -0.42                                | 0.56                                       | 0.77                                 | 0.54                                 | -0.32      | 0.69            |
| RhMn@<br>S <sub>V</sub> -MoS <sub>2</sub> | Vlomer    | 0.16                                 | 0.80                                       | -1.01                                | -0.24                                      | 0.69                                 | 0.41                                 | -0.47      | 0.59            |
|                                           | Heyrovsky | 0.34                                 | 0.73                                       | -0.47                                | 0.17                                       | 0.40                                 | 0.54                                 | -0.35      | 0.30            |
| 2Fe@<br>S <sub>V</sub> -MoS <sub>2</sub>  | Vlomer    | 0.21                                 | 0.80                                       | -0.99                                | -0.19                                      | 0.70                                 | 0.40                                 | -0.47      | 0.61            |
|                                           | Heyrovsky | 0.39                                 | 0.69                                       | -0.49                                | 0.22                                       | 0.46                                 | 0.53                                 | -0.38      | 0.36            |

**Table S7.** The initial features used in training model and intrinsic descriptor of atoms.

| Metal | $\chi$ | $R_a$ (Å) | $R_c$ (Å) | $R_{vdw}$ (Å) | $N_e$ | $N_d$ | $N_p$ | $N_g$ |
|-------|--------|-----------|-----------|---------------|-------|-------|-------|-------|
| Ti    | 1.54   | 1.40      | 1.36      | 2.46          | 4     | 2     | 4     | 4     |
| V     | 1.63   | 1.35      | 1.25      | 2.42          | 5     | 3     | 4     | 5     |
| Cr    | 1.66   | 1.40      | 1.27      | 2.45          | 6     | 5     | 4     | 6     |
| Mn    | 1.55   | 1.40      | 1.39      | 2.45          | 7     | 5     | 4     | 7     |
| Fe    | 1.83   | 1.40      | 1.25      | 2.44          | 8     | 6     | 4     | 8     |
| Co    | 1.88   | 1.35      | 1.26      | 2.40          | 9     | 7     | 4     | 8     |
| Ni    | 1.91   | 1.35      | 1.21      | 2.40          | 10    | 8     | 4     | 8     |
| Cu    | 1.90   | 1.35      | 1.38      | 2.38          | 11    | 10    | 4     | 1     |
| Zn    | 1.65   | 1.35      | 1.31      | 2.39          | 12    | 10    | 4     | 2     |
| Zr    | 1.33   | 1.55      | 1.48      | 2.52          | 4     | 2     | 5     | 4     |
| Nb    | 1.60   | 1.45      | 1.37      | 2.56          | 5     | 4     | 5     | 5     |
| Mo    | 2.16   | 1.45      | 1.45      | 2.45          | 6     | 5     | 5     | 6     |
| Ru    | 2.20   | 1.30      | 1.26      | 2.46          | 8     | 7     | 5     | 8     |
| Rh    | 2.28   | 1.35      | 1.35      | 2.44          | 9     | 8     | 5     | 8     |
| Pd    | 2.20   | 1.40      | 1.31      | 2.15          | 10    | 10    | 5     | 8     |
| Ag    | 1.93   | 1.60      | 1.53      | 2.53          | 11    | 10    | 5     | 1     |

| Metal | $IE$ (eV) | $IE-2$ (eV) | $EA$ (eV) | $T_b$ (K) | $T_m$ (K) | $\lambda$ (kJ/mol) | $\Delta H_{vap}$ (kJ/mol) |
|-------|-----------|-------------|-----------|-----------|-----------|--------------------|---------------------------|
| Ti    | 6.8281    | 13.5750     | 0.0755    | 3560      | 1941      | 18.7               | 425                       |
| V     | 6.7462    | 14.6600     | 0.5276    | 3680      | 2183      | 22.8               | 453                       |
| Cr    | 6.7665    | 16.4850     | 0.6759    | 2944      | 2180      | 20.5               | 339                       |
| Mn    | 7.4340    | 15.6400     | -0.5182   | 2334      | 1519      | 13.2               | 220                       |
| Fe    | 7.9030    | 16.1880     | 0.1532    | 3134      | 1811      | 13.8               | 347                       |
| Co    | 7.8810    | 17.0800     | 0.6622    | 3200      | 1768      | 16.2               | 375                       |
| Ni    | 7.6399    | 18.1690     | 1.1572    | 3186      | 1728      | 17.2               | 378                       |
| Cu    | 7.7270    | 20.2920     | 1.2357    | 2835      | 1357.77   | 13.1               | 300                       |
| Zn    | 9.3942    | 17.9640     | -0.6011   | 1180      | 692.68    | 7.35               | 119                       |
| Zr    | 6.6341    | 13.1600     | 0.4332    | 4682      | 2128      | 21                 | 580                       |
| Nb    | 6.7589    | 14.3000     | 0.9173    | 5017      | 2750      | 26.8               | 690                       |
| Mo    | 7.0924    | 16.1700     | 0.7473    | 4912      | 2896      | 36                 | 600                       |
| Ru    | 7.3605    | 16.7900     | 1.0392    | 4423      | 2607      | 25.7               | 580                       |
| Rh    | 7.4589    | 18.0300     | 1.1429    | 3968      | 2237      | 21.7               | 495                       |
| Pd    | 8.3368    | 19.3800     | 0.5622    | 3236      | 1828.05   | 16.7               | 380                       |
| Ag    | 7.5762    | 21.4500     | 1.3044    | 2435      | 1234.93   | 11.3               | 255                       |

**Table S8.** The  $E_{\text{TM}}$  of each metal by DFT calculation.

| Metal | $E_{\text{TM}}$ (eV) |
|-------|----------------------|
| Ti    | -2.1803              |
| V     | -3.7885              |
| Cr    | -5.4402              |
| Mn    | -5.1430              |
| Fe    | -3.2045              |
| Co    | -1.7100              |
| Ni    | -0.3162              |
| Cu    | -0.2261              |
| Zn    | 0.0103               |
| Zr    | -2.0258              |
| Nb    | -3.1730              |
| Mo    | -4.6345              |
| Ru    | -2.3315              |
| Rh    | -1.1608              |
| Pd    | -1.4510              |
| Ag    | -0.1814              |

## References

1. K. Chan, J. K. Nørskov, *J. Phys. Chem. Lett.*, 2015, **6**, 2663-2668.

2. R. Ouyang, S. Curtarolo, E. Ahmetcik, M. Scheffler, L. M. Ghiringhelli, *Phys. Rev. Mater.* 2018, **2**, 083802.
